# Supplementary material
Source: PubMed Central journal article supplement (PMC3605964)
Supplement: supp_mct032_mct032supp.pdf [file supp_mct032_mct032supp.pdf]

## SUPPLEMENTARY DATA

TABLE S1. SNP information and genotyping of the parents used in this study, including the GeneBank accessions, genomic sequences surrounding each SNP and the genotyping of the progeny parents.

| SNP marker | GENEBANK ACCESSION | Genomic sequence surrounding the SNP                                                                                                       | Haploid Chandler | Haploid Clementine | Fortune | Willow leaf | Clementine 2x | Clementine 4x | Nadorcott | Pink |
|------------|--------------------|--------------------------------------------------------------------------------------------------------------------------------------------|------------------|--------------------|---------|-------------|---------------|---------------|-----------|------|
| CiC0610-01 | ET093305           | CAACTTAAAATCCCACTTTACTCTTTCCACATGGGCCGT<br>CATGATGGTGTGTTTTGACTGC[A/G]CTTGTTACTTCCACT<br>AAACCCTTTTAAAGATTGCAGATCTCTTTGTTTGAGTTAA<br>AATAT | -                | -                  | -       | -           | AG            | -             | G0        | -    |
| CiC0868-01 | ET095107           | ACAGTTTCTGGGATCCAYATTTGATACCAACTTCATTTCA<br>AGGGTAACTTTCAGGAACTA[A/G]GATACAGTATGTGCC<br>TTTAAATTCTATTAATCACGTGGGATCATTACGATGTCTT<br>GCTTT  | -                | -                  | -       | -           | CT            | CCTT          | CC        | TT   |
| CiC1380-05 | ET072553           | TTGCTCGAGAAGTCAAACTTTACAGGAATGCATTACTG<br>GCCTATCTGGAGAGAAAAGCTC[A/G]AGTACAGAAGGACT<br>GCAATGAGTTGAGGGCCATAAACGAGGATTTGTTATCC<br>CGACAAAA  | -                | -                  | -       | -           | CT            | CCTT          | CC        | 00   |
| CiC1749-05 | ET097636           | ACATTACTGTCTACCCCGCAGATACTAATAAGGTATT<br>TATGATCATGTTTTTGCTTCT[A/C]ATATTGCTGACTTCTG<br>CTGTTTTTGTGGAAATTGATGTTCTGTGATTGATGTGGA<br>GTCA     | -                | -                  | -       | -           | GT            | -             | G0        | -    |
| CiC1757-02 | ET097717           | GTTTTAGCTTTGAAAAATCAGATACTTCCTCTCGAGT<br>CAAGGTAGGTTCTTACTT[A/C]CCATCTTCTATATCT<br>GATGCATCTCTGTTAAAGAAGCGATCTGAACTTCAAATT<br>TCAGAT       | -                | -                  | -       | -           | AC            | -             | CC        | -    |
| CiC2840-01 | ET103429           | TTTATTTATTTACTTATGTATTTGTTTTGTAAATTTTAAATA<br>TTTCAGATCCGCACAYAT[A/G]GCGAAAAGAGCGTTGTA<br>CGGTTGTTGAGGCTCACGAGTTCAATTGACTGTGGACA<br>TATCC  | C                | T                  | CT      | CT          | CT            | -             | TT        | -    |
| CiC3440-07 | ET077539           | TTTTTATTTTTATTTTTATTCTTATTTTTGCCTCTTGAATCC<br>ATCGGTATTCTGGCTAT[A/G]AAAGAGAAGTTCAACTTC<br>TAGCCGAATTAATACTGCCATTCCAAATATGTT<br>GA          | -                | -                  | -       | -           | AG            | AAGG          | GG        | G0   |
| CiC4581-01 | ET109034           | CCATTCAAATAAAAATCCTAAACATTCAATCATTAAACAAT<br>CACAGAGATGAAATCCCAG[A/C]GGTTCAATAAGGCTG<br>GTGGTTCTCAAAGCACTGAACTGCATAATATAAAAATAGG<br>AAAAAG | -                | -                  | -       | -           | AC            | AACC          | AA        | AA   |

|            |          |                                                                                                                                             |   |   |    |    |    |      |    |    |
|------------|----------|---------------------------------------------------------------------------------------------------------------------------------------------|---|---|----|----|----|------|----|----|
| CiC5089-06 | ET111533 | TCAGAACAACATAAAAATACCACTTTTKTTTTTGAAGT<br>GGAGGAAATTTTCAGTGAAGA[A/G]CAGGAAGGCATCACA<br>TCTGATTCAAACAGTGAGATTGATGGGAAAGAAAATTCT<br>AACCAG    | C | T | CT | CT | CT | CCTT | CC | CC |
| CiC5785-01 | ET082673 | TCAACCACCTTGATAAATGAACAAAAGGAGGCTTAAACT<br>TTGACTTCAATTTTAGCCATT[A/T]GTTATGTTCAATCTAA<br>TGATTATAATGATTGCAATTTAAGACGCTTTGATTGAATT<br>ACTA   | T | A | AT | AT | AT | AATT | TT | TT |
| CiC6278-01 | ET085551 | CCTATTATGTTTTATTTAAATTGTTGGTGGACGATAAAATT<br>TATTGGCCAATTCAGAATTC[A/C]TAGTCATAATGAAATT<br>CTGTACACATAAAAAGCCAAAATGGGTGACTCAGTTCTTT<br>GTGTA | - | - | -  | -  | AC | AACC | AA | 00 |
| DXS M618   | DN959423 | GGTGCAGGACATAGTTCCACAAGCATCTCTGCTGGTCT<br>TGGTATGTACTTC[G/A]CTCTCTTAATATTTTCCTTCATC<br>AATCTAGAGAAATTGTAGGATGCAGAATAC                       | A | G | AG | AG | -  | -    | -  | -  |
| F3H-M309   | JX630066 | CTAAGCCGTCGAGTTTTTGTGACCAAAGGGACAGAATC<br>TAATGAGTTTAAGGA[T/C]ATGGTGGTAGAGCTCATGAC<br>GTCAGCTGGATTTTTCAACATTGGTGATTTTATACCC                 | C | T | CT | CT | -  | -    | -  | -  |
| FLS-M400   | AB011796 | GGGTTGATCATCTCTTCCACAGGGTTTGGCCTCCGTCTT<br>CTATCAACTACCGCTT[T/C]TGGCCCAACAACCCTCCTTC<br>TTACCGGTGAATGTT                                     | C | T | CT | CT | -  | -    | -  | -  |
| TRPA-M593  | EF028327 | GGCACGACAGCATTTCGTGAGCATGTGGATGCATAACGT<br>GGCAGCAGCAGTGAT[G/C]ATGATGCCAGTGGCCACTG<br>GGATCTTACAGAACTTGCCAGAGGTTC                           | C | G | CG | GG | -  | -    | -  | -  |

---
